# Supplementary material
Source: bioRxiv or medRxiv preprint supplement (https://medrxiv.org/highwire/filestream/83311/field_highwire_adjunct_files/0/2020.04.18.20063875-1.pdf)
Supplement: Supplementary file [file 2020.04.18.20063875-1.pdf]

**Submission Statement**

**Manuscript Title:**

*National Consumption of Antimalarial Drugs and COVID-19 Deat Dynamics :  
an Ecological Study .*

**All authors** who have contributed to the submitted manuscript must submit a signed (original signature) copy of this Submission Statement.

By signing the Submission Statement, the authors confirm that they have read and agreed to the following terms and conditions of this Submission Statement, including that

- the submission is original and has not been published previously
- all permissions have been obtained
- the manuscript includes all the relevant statements and acknowledgements
- the copyright will be transferred to S. Karger AG upon acceptance

| Printed Name:         | E-Mail:                         | Signature:                                                                           | Place and Date:                      |
|-----------------------|---------------------------------|--------------------------------------------------------------------------------------|--------------------------------------|
| <i>Izoulet Maxime</i> | <i>maxime.izoulet@gmail.com</i> |  | <i>Montluçon,<br/>27th may 2020.</i> |
|                       |                                 |                                                                                      |                                      |
|                       |                                 |                                                                                      |                                      |
|                       |                                 |                                                                                      |                                      |
|                       |                                 |                                                                                      |                                      |
|                       |                                 |                                                                                      |                                      |

Please print and sign this form and upload it when submitting your manuscript or fax or e-mail it to:

**S. Karger AG - Medical and Scientific Publishers**  
Editorial Office *Microbial Physiology*  
Allschwilerstrasse 10  
CH-4009 Basel (Switzerland)  
Fax: +41 61 306 14 34  
E-Mail: mip@karger.com

The submitting authors hereby declare that:

- This contribution is original; the work has not been published previously (in whole or in part) in any language (except as an abstract of 400 words or less) and is not currently under evaluation by another publisher. If the manuscript reports work that has already been reported in large part in a published article, the previously published article has been clearly referenced.
- Any required permission has been obtained to reproduce illustrations, tables, etc., from other publications.
- Each author has (1) made substantial contributions to the conception or design of the work, or to the acquisition, analysis, or interpretation of data for the work; (2) participated in drafting the work or revising it critically for important intellectual content; (3) approved the final version to be published; and (4) agreed to be accountable for all aspects of the work in ensuring that questions related to the accuracy or integrity of any part of the work are appropriately investigated and resolved (see [ICMJE Criteria for Authorship](#)). The contributions of each person named as an author have been included in an **Author Contributions Statement** at the end of the main text. If an author is removed from or added to the listed authors after submission, an explanation and a signed statement of agreement confirming the requested change are required from all the initially listed authors and from the author to be removed or added.
- Any contributors who have participated in the study but who do not meet all 4 criteria for authorship (see above) have been acknowledged in the **Acknowledgements** at the end of the main text.
- Any financial interests (stocks, patents, employment, honoraria, or royalties) or nonfinancial relationships (political, personal, or professional) that may be interpreted as having influenced the content of the manuscript have been declared in a **Disclosure Statement** at the end of the main text. If the authors have no conflicts of interest, this has been declared in the **Disclosure Statement** as well.
- Full details about the funding of any research relevant to the study underlying this manuscript, including sponsor names and explanations of the roles of these sources in the preparation of data or the manuscript, have been declared in a **Funding Sources Statement** at the end of the main text. If the study did not receive any funding, this too has been declared in the **Funding Sources Statement**.

- The research presented in the manuscript was conducted ethically in accordance with the World Medical Association Declaration of Helsinki and the appropriate guidelines for human studies as well as according to animal welfare regulations, including the Animal Research: Reporting of in vivo Experiments (ARRIVE) guidelines, and was approved by the appropriate institutional review bodies. In a **Statement of Ethics** at the end of the main text, the authors have indicated whether the procedures followed were assessed by the responsible review committee (institutional and national) and whether the informed consent of patients was obtained. If no approval is required, this too has been stated in the **Statement of Ethics**. Clinical trials have been registered in a public trials registry, and the trial registration number has been provided at the end of the Abstract.
- The full and correct names, affiliations, and e-mail addresses of all authors have been entered in the submission system.
- This paper will not be submitted simultaneously to any other publication during the review process.

The submitting authors furthermore agree that:

- The copyright to this manuscript will be transferred (for US government employees: to the extent to which it is transferable) to S. Karger AG, Medical and Scientific Publishers, effective if and when the manuscript is accepted for publication by *Microbial Physiology*. The authors hereby assign and transfer all rights, title, and interest thereto including the right to claim copyright throughout the world to the publisher.
- The copyright covers the exclusive right to publish, reproduce, distribute, archive, translate, sell the manuscript in all languages, all forms and all media now known or later devised or perfected, throughout the world in perpetuity, as well as the right to sublicense the manuscript in whole or in parts, including reprints, translations, or any other reproductions of similar nature.
- If we wish to publish our paper as an Open Access article, we can do so by selecting the option Author's Choice™ upon acceptance. More information regarding Open Access licensing and costs can be found in the Author Guidelines.
- Karger may provide a cooperating partner ('the Partner') and/or its subcontractor(s) with all the information about the authors that the Partner and/or its subcontractor(s) essentially requires to appropriately carry out the services agreed on with Karger. Any data transfer to the Partner and/or its subcontractor(s) is permitted solely in cases where the provided services are in a close relationship with the publication of the submitted manuscript and specific promotional activities concerning the respective article and the appropriate journal.
